# Supplementary material for: Structure of the Caenorhabditis elegans m6A methyltransferase METT10 that regulates SAM homeostasis
Source: PubMed Central journal article supplement — Nucleic Acids Res. 2023 Feb 16;51(5):2434–46. doi: 10.1093/nar/gkad081 (PMC10018337; doi:10.1093/nar/gkad081), 2023-02-16
Supplement: gkad081_supplemental_file.pdf [file gkad081_supplemental_file.pdf]

## Supplementary Data

### Structure of the *Caenorhabditis elegans* m<sup>6</sup>A methyltransferase METT10 that regulates SAM homeostasis

Jue Ju, Tomohiko Aoyama, Yuka Yashiro, Seisuke Yamashita, Hidehito Kuroyanagi,  
Kozo Tomita

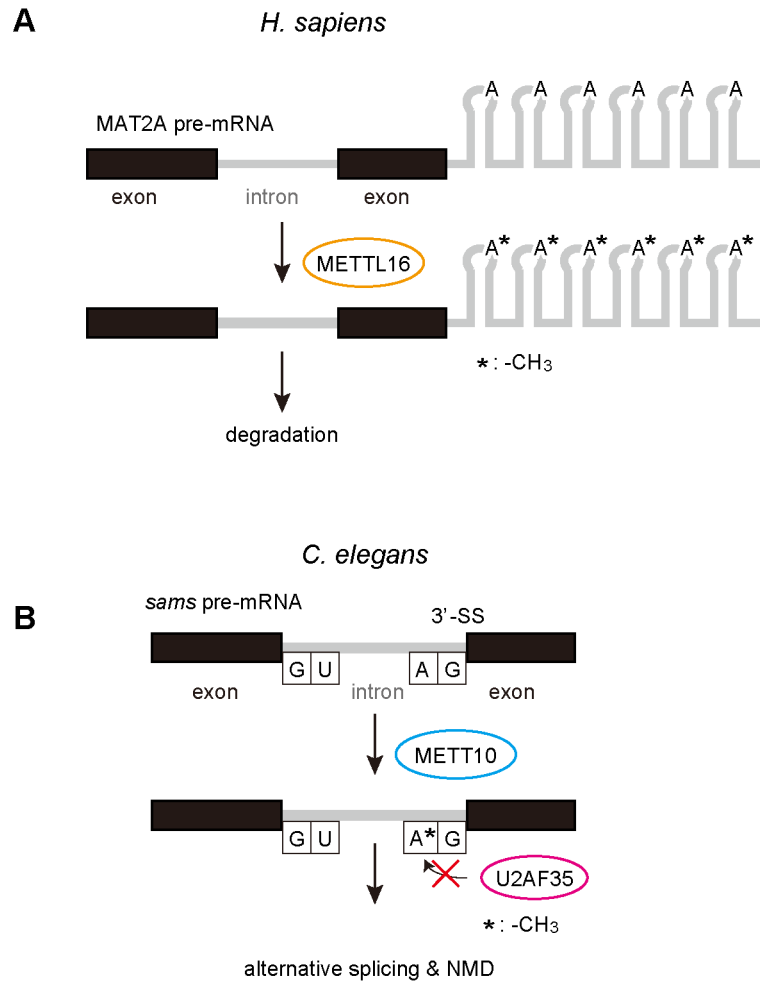

**Supplementary Figure 1:** Different mechanisms of SAM homeostasis between (A) *H. sapiens* and (B) *C. elegans*.

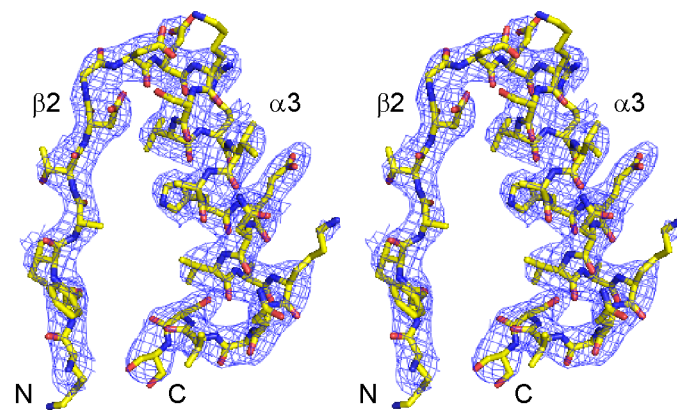

**Supplementary Figure 2: 2Fo-Fc electron density map of CeMETT10-MTD.**

2Fo-Fc electron density map contoured at 1.0  $\sigma$  around the residues corresponding to  $\beta 2$  and  $\alpha 3$  of CeMETT10 (residues Lys126 - Ser151).

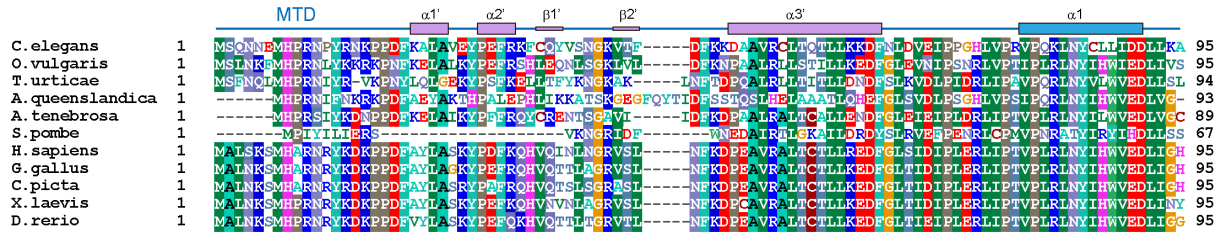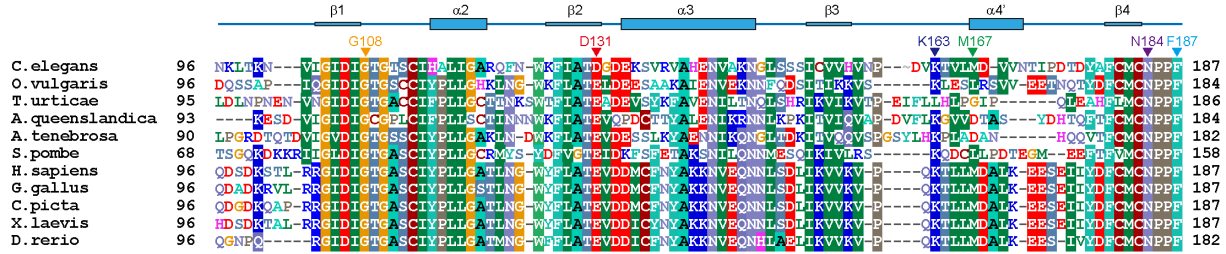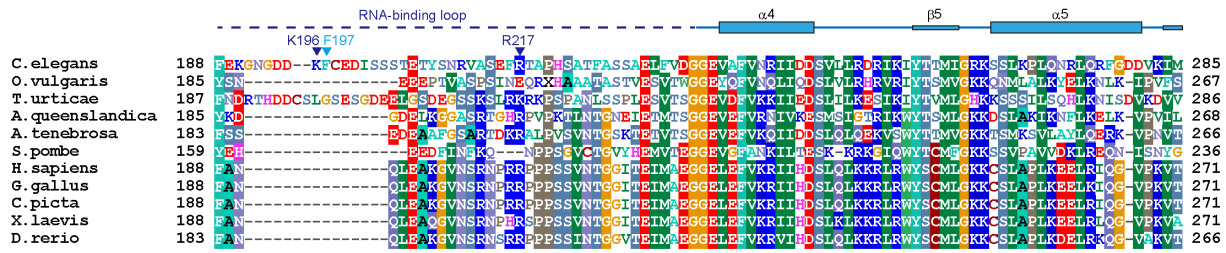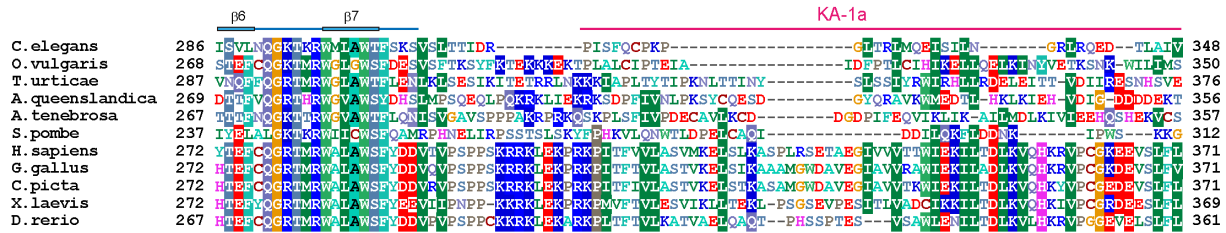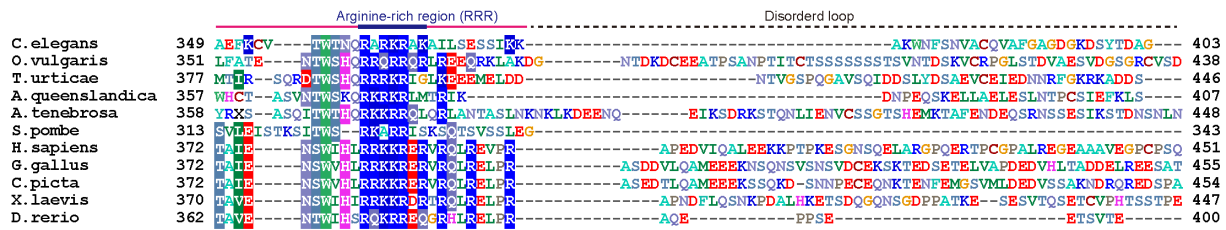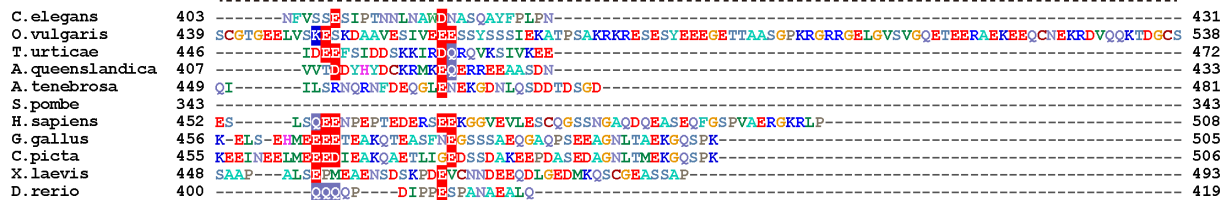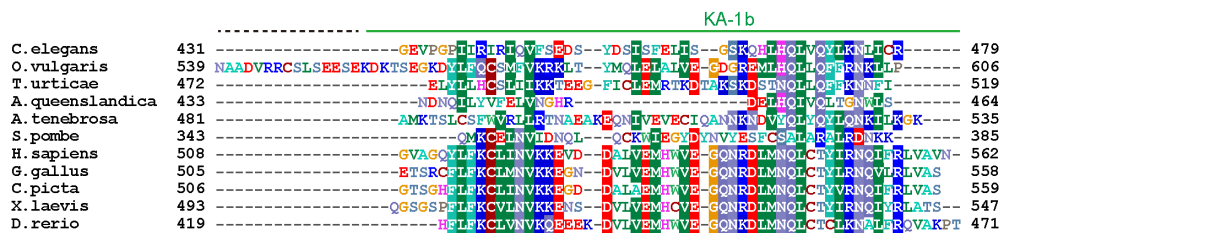

**Supplementary Figure 3: Alignment of the amino acid sequences of *C. elegans* METT-10 homologs from other organisms.**

Invertebrates [*C. elegans* (MET16\_CAEEL), *O. vulgaris* (A0A6P7TIF1\_OCTVU), *T. urticae* (T1JVZ0\_TETUR), *A. queenslandica* (A0A1X7U5N0\_AMPQE), and *A. tenebosa* (A0A6P8ITS0\_ACTTE),] fungus [*S. pombe* (MTL16\_SCHPO)] and vertebrates [*H. sapiens* (MET16\_HUMAN), *G. gallus* (MET16\_CHICK), *C. picta* (A0A8C3F3B3\_CHRPI), *X. laevis* (MET16\_XENLA), and *D. rerio* (MET16\_DANRE)].

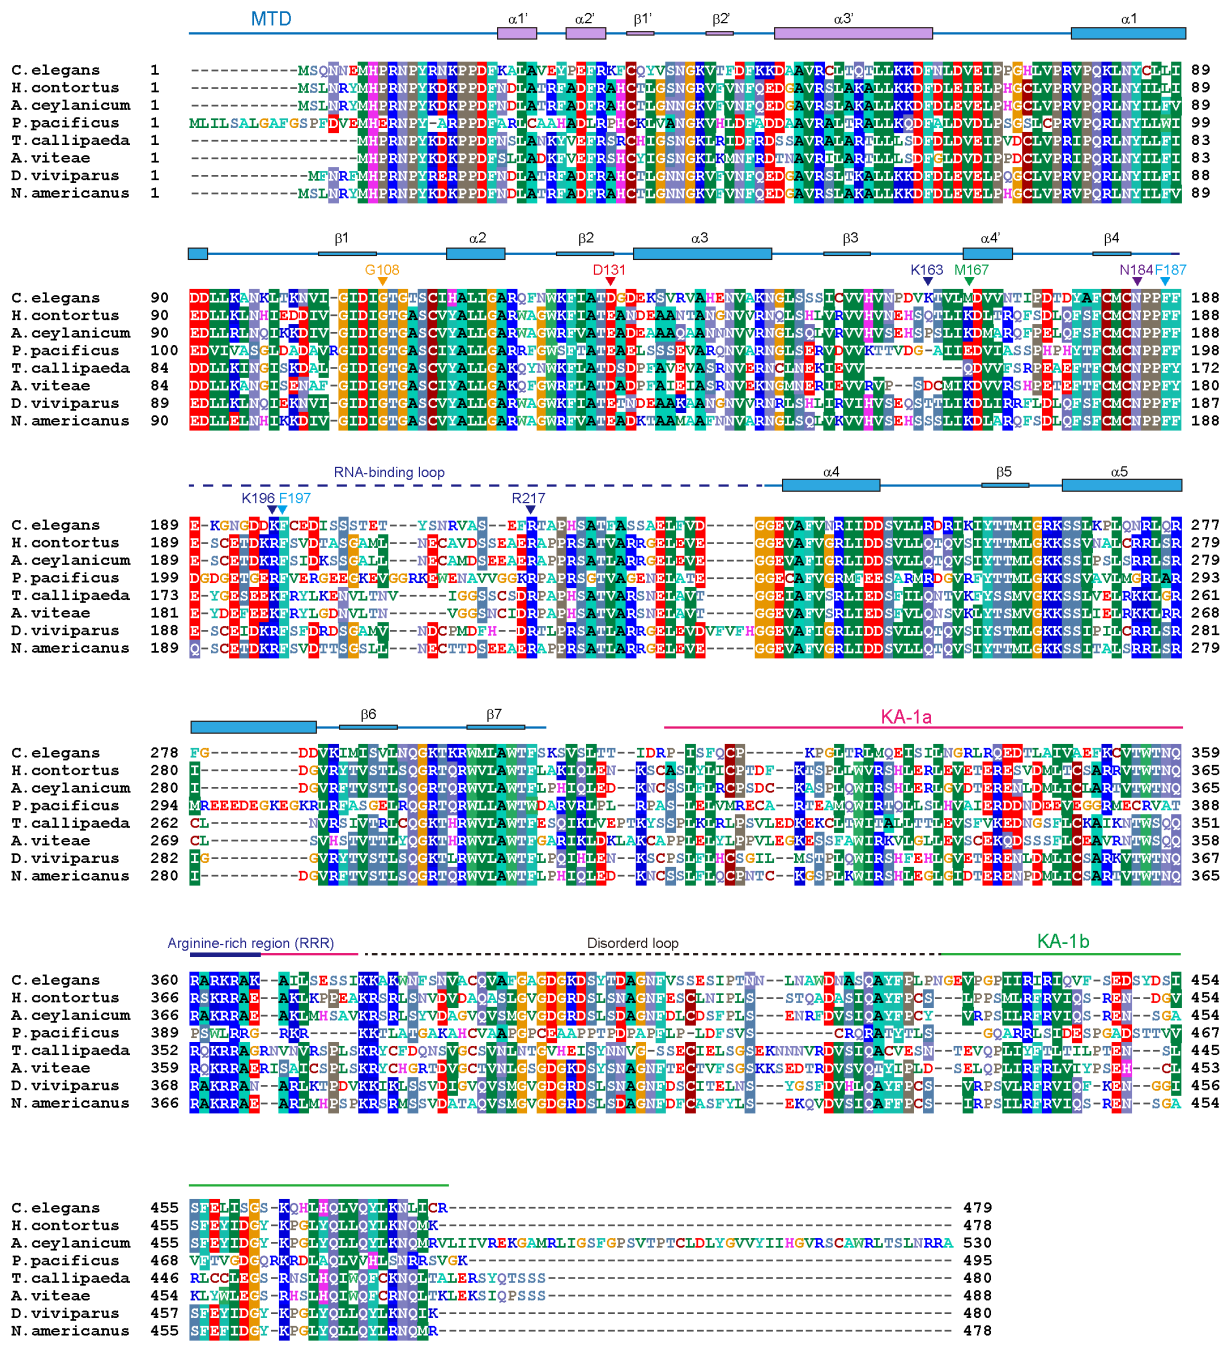

Supplementary Figure 4: Alignment of the amino acid sequences of *C. elegans* METT-10 homologs from other worms.

*H. contortus* (A0A7I4YYI6\_HAECO), *A. ceylanicum* (A0A016V3Y4\_9BILA), *P. pacificus* (A0A2A6CIQ0\_PRIPA), *T. callipaeda* (A0A0N5D327\_THECL), *A. viteae* (A0A498S9S7\_ACAVI), *D. viviparus* (A0A0D8YCA1\_DICVI), and *N. americanus* (W2TKK9\_NECAM). Residues K196/F197 and R217 are highlighted. The secondary structural elements of the CeMETT10-MTD are depicted in parentheses above the alignment. The C-terminal regions predicted to be KA-1 (KA-1a and KA-1b) by AlphaFold2 are also shown above the alignment. The region between KA-1a and KA-1b is predicted to be disordered.



**A**

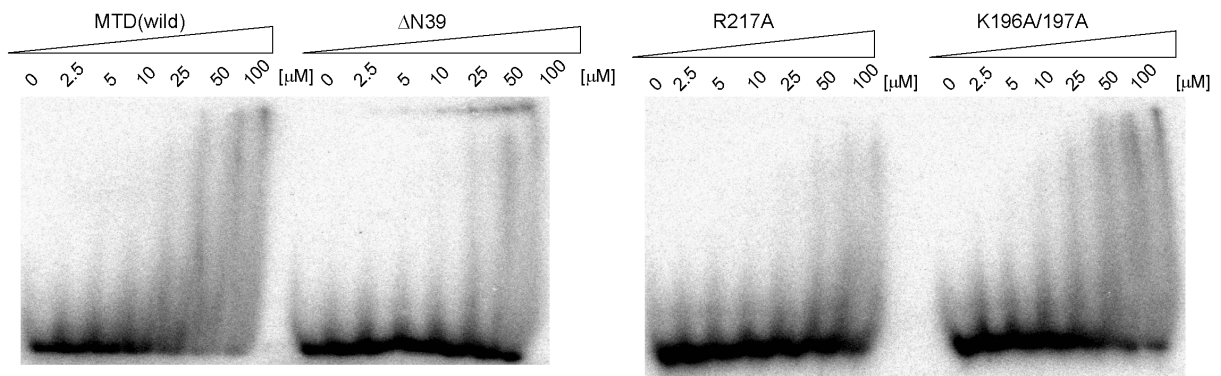

**B**

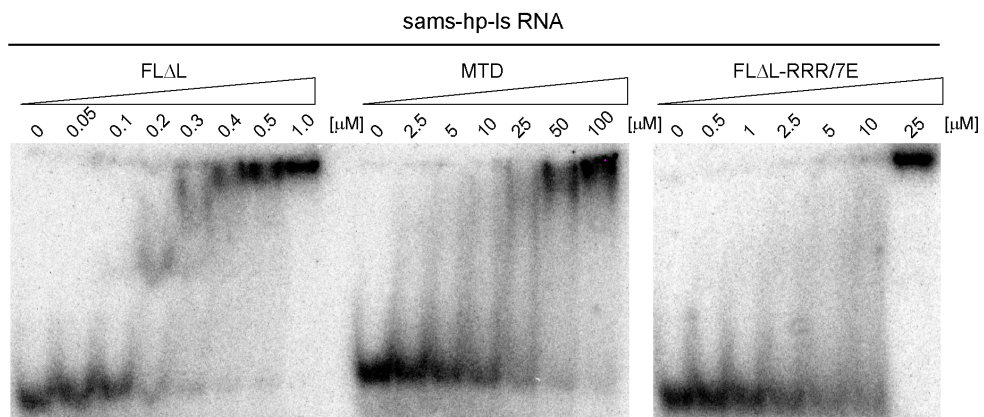

**C**

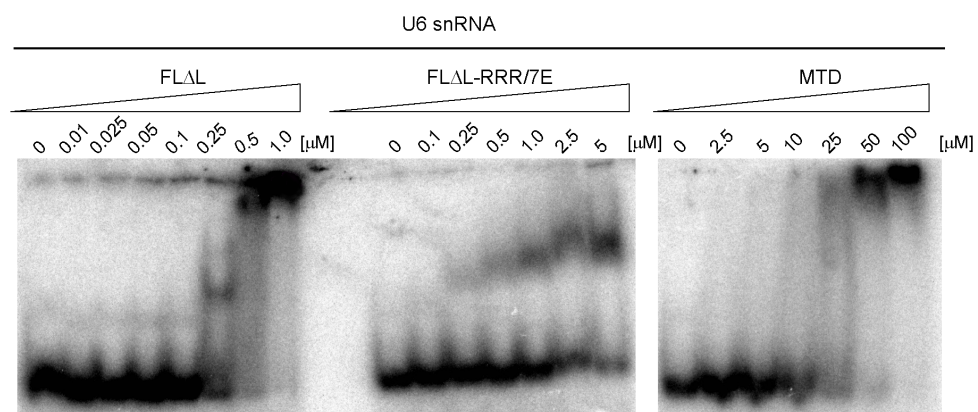

**Supplementary Figure 5: Gel-shift assays**

(A) Gel-shifts of *sams-hp* by CeMETT10-MTD and its variants ( $\Delta$ N39, R217A and K196A/F197A). (B) Gel-shifts of *sams-hp-ls* by CeMETT10-FL $\Delta$ L and its variants (MTD and FL $\Delta$ L-RRR/7E). (C) Gel-shifts of U6 snRNA by CeMETT10-FL $\Delta$ L and its variants (MTD and FL $\Delta$ L-RRR/7E).

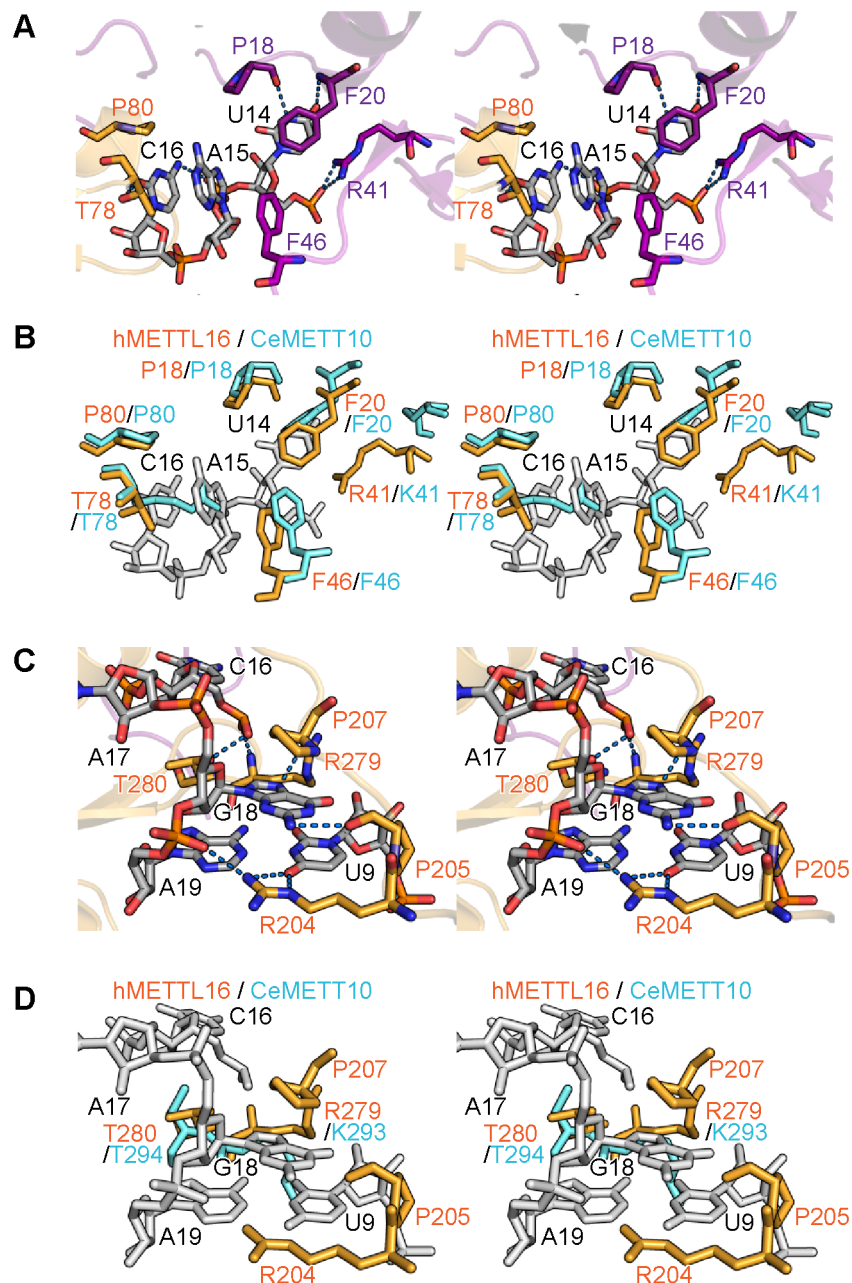

### Supplementary Figure 6

(A) Interaction between hMETTL16 and MAT2A-hp (residues U14A15C16 are shown). (B) Superimposition of the structure of CeMETT10 (cyan) on the structure of hMETTL16 (orange) complexed with MAT2A-hp in (A). MAT2A-hp is colored gray. (C) Interaction between hMETTL16 and MAT2A-hp (residues A17G18A19 are shown). (D) Superimposition of the structure of CeMETT10 (cyan) on the structure of hMETTL16 (orange) complexed with MAT2A-hp in (C).



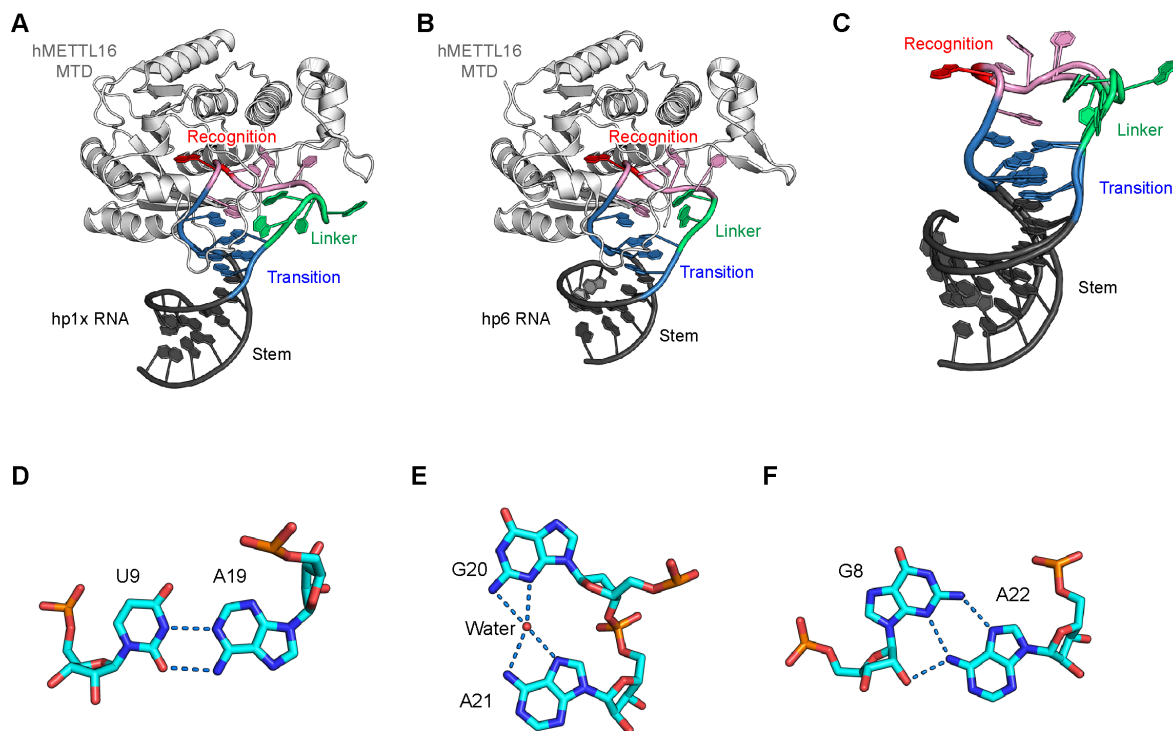

### Supplementary Figure 7

(A) Structure of METTL16-MTD in complex with MAT2A-hp1x RNA (PDB: 6DU4) (1). (B) Structure of METTL16-MTD in complex with MAT2A-hp6 RNA (PDB:6DU5) (1). (C) Superimposition of the MAT2A- hp1x and MAT2A-hp6 RNAs (1) (D) Structures of the base pairs in the transition region of *MAT2A*-hp1 in a complex with hMETTL16-MTD. U9 and A19 form the reverse Watson-Crick base pair. (E) G20 and A21 are in the same plane and interact through water-mediated hydrogen bonds. (F) Hydrogen bonds between the sugar edge of G8 and the Hoogsteen edge of A22.

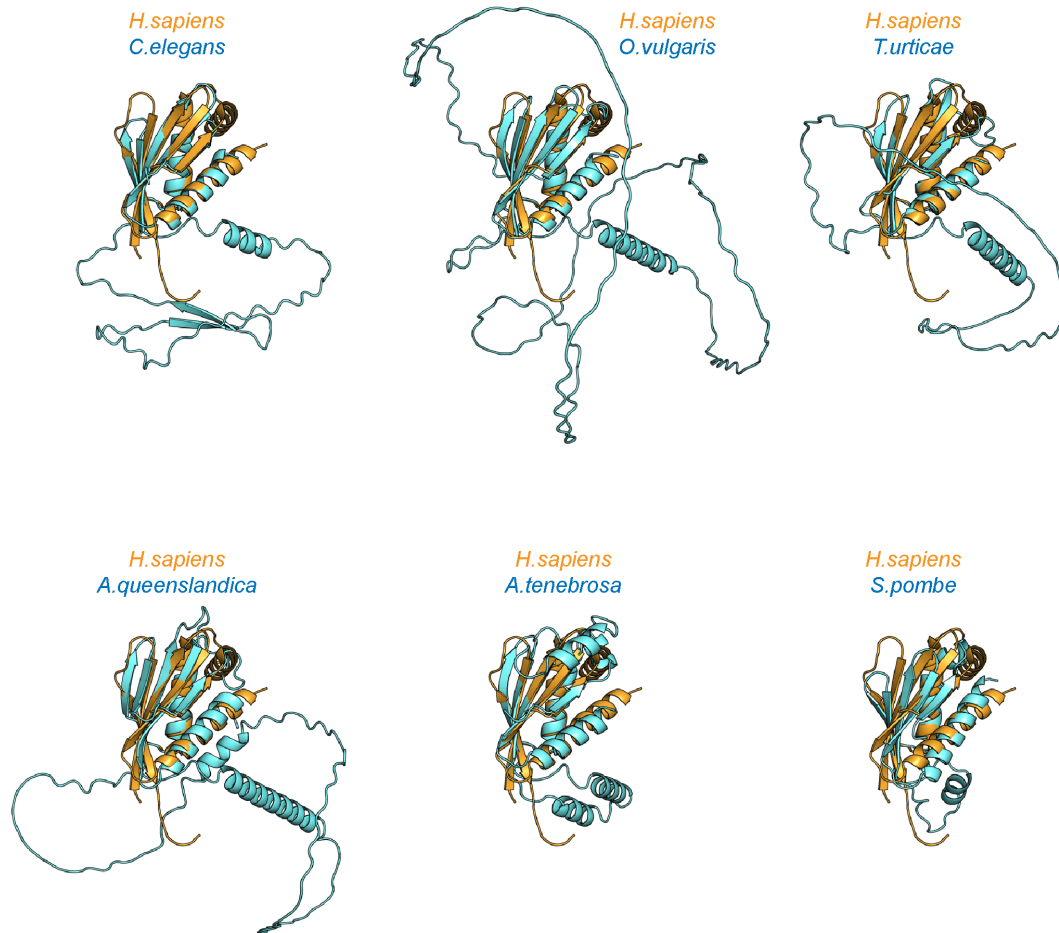

**Supplementary Figure 8: Structural comparison of the C-terminal region of h METTL16 to those of other organisms.**

Model structures of the C-terminal regions of human METTL16 homologs from invertebrates [*C. elegans* (MET16\_CAEEL), *Octopus vulgaris* (A0A6P7TIF1\_OCTVU), *Tetranychus urticae* (T1JVZ0\_TETUR), *Actinia tenebrosa* (A0A6P8ITS0\_ACTTE), and *Amphimedon queenslandica* (A0A1X7U5N0\_AMPQE) and fungus [*Schizosaccharomyces pombe* (MTL16\_SCHPO)] generated by AlphaFold2 (2,3). The C-terminal region of human METTL- 16, termed KA-1, is colored orange (PDB: 6M1U) (4).

```

hMETTL16_6gfnA 53 -----ALCTLLRREDPGL---SIDIPLERL 75
CeMETT10      53 -----CLTQTLLKKDFNL---DVEIIPPHL 75
hBCDIN3D_618uA 28 -----APFGNFPFH 42
hMePCE_6dcca 411 -----KFQYGNFYCK 420
hTRMT61A_5ccbA 64 -----WVYVLPHTPELWTLNLPH---RT 84
hNSUN6_5wwsA 133 PGIVSASQFMKAGDVISVYSDIKKCKKGAKEFDGTVKVLNGISELRSKEIFSGLPPELKGMGIRMTPEVYVLSPSFDSVLPRLYLF 217
mDNMT1_4da4A 1092 -----

```

```

                                D108 G110                                E133 V134
hMETTL16_6gfnA 76 IP-----TVPLRNYTHWSDLIGH---QDKSTLRRGTDICFGASCIIYFELGATLNG-----W-YF-LATEVDDMCFNIAKKNVEQNN-LSDLRKV 157
CeMETT10      76 VP-----RVPQRKNYCLLIDLLKANKLT---KNVIGHDIDEGTSCITHALIGARQFN-----W-KF-LARDGDEKSVRVAEENVAKNG-LSSSTCV 155
hBCDIN3D_618uA 43 YS---RFHPPEQRTR--LPPPELLRQLFPSPSENGPILGDDVGCN--SGDSDVLYKHFSLASREF-RL-LCCDIDPVLVVRABREC---P-FEDADTF 131
hMePCE_6dcca 421 YYGYRNPSCEDEGRVR--LKPESW-----FRGRDVIDLGCNV--GHDTLSLACKWG-----PSRM-VGLDIDSRILHSARONIRHYLSVFPNNVVF 555
hTRMT61A_5ccbA 85 QI---LYSTDIALITMME---LR---PGSVVCESGTG--SGSVSHAIRITA-----PTG-HL-HIVVEFHQQRARAKARBEQERH-VGRVAVV 159
hNSUN6_5wwsA 217 -L---QNLPSALVSBVLN--PQ---PGEKIIDICAA--EGSKTTHLALMHH---DQG-EV-LALDKIFNKVEKIKONALLG--LN-SIRA 289
mDNMT1_4da4A 1092 -----NSKTKNFEDPPNHARSPGNIKL---PKLRTIDVPSGC--GGLSSEGFHQAGI-----S-ETLWATEMWDPAQAQFRNNP-----GTIV 1189
                                Motif 1                                Motif 2

```

K-loop

```

                                T164
hMETTL16_6gfnA 158 VKVP--QKTLIM-----DAI--KEES--EIIIDFQMCNPE--F-----GEL---EF-----VKRIITHDSLQ--LKK 240
CeMETT10      156 VHVNDVKTVM-----DVV--NTIP--DIDAFQMCNPE--F-----GEV---AF-----VRIITDSDVL--LRD 253
hBCDIN3D_618uA 132 IITL--DFMNRTRK-----VIL--SSFLSQFGRSVVDIGFCMSI-----TMW---IHLNHGDHGLWBEIAHL--SS 188
hMePCE_6dcca 556 VTG---NRYVID-----RDDLVEAQTEPDVVLCSLTK-----WVHLNWDEEG--LKRMRRIYR--HLR 608
hTRMT61A_5ccbA 160 RQV---DVCRSG--FCV--S---HVADAVFDIE-----PWEVGLAWDALKVE 199
hNSUN6_5wwsA 290 FCF---DQKAVKLDVVEPFL--S---PESDRIITDAP--CSGMGQRPMACTWSVKEVASYQ--PL---QRKLFPAVQ--LLK 363
mDNMT1_4da4A 1190 FTE---DCNVLKLVMAGEVTNSLGEQLPQ--KGDVEMLCGGPE--C---QGFSGMNRNFSRTYSKFKN-----SL---VVSFTSYCDY--YR- 1262
D135(hBCDIN3D) Motif 3

```

```

hMETTL16_6gfnA 241 RLRWYSCML-GKK-----C-SIAPLKEPRIQG-V-EKV-T-----Y-TEFC-Q----- 277
CeMETT10      254 RIKLYTMTI-GRK-----S-SIKPLQNRQRFQDD-VKI-M-----I-SVLN-Q----- 291
hBCDIN3D_618uA 189 LCHYLVWEP-QPWKCYRAARLRKLGHDHDFHSLAIRGD-MENQIVQIHTQD-HG-METIC-----C-FGN----- 252
hMePCE_6dcca 609 PGGIILWLEP-QPW-----SSYGKRKRLTETIYKNIYRIQLKKEPFSSYITSDVGFSSY-E-----LVATPHNT----- 670
hTRMT61A_5ccbA 200 G-GRFCSSFS-PCI-----E-VQRTQQLAAR--CFSEL-S-----T-LEVL-PQVYV 240
hNSUN6_5wwsA 364 PEGVIVYSCTIT-----LAENDEQAVAWALKFPC-LQL-QPQEPQIGGEGMRGAGLSCBQLKQL-QRFD-P----- 426
mDNMT1_4da4A 1262 -PRELELEN-VRN-----FVSYRRSM-VIKRLTRCIVRM--S-YQC-T-----F-GVLQ-A----- 1304

```

```

hMETTL16_6gfnA 277 -----G--R-----T-MRWALAMSEYD----- 291
CeMETT10      291 -----G--K-----T-KRRLAMTFESKS-VSL----- 309
hBCDIN3D_618uA 252 -----S--K-----TSW-DRSLLPRA----- 264
hMePCE_6dcca 670 -----S--K-----GFQREVILFHKARSP----- 687
hTRMT61A_5ccbA 241 RTVSLPPPDLGTGDTSPFRSGTFMKEAV--G-----H-TGYLTFATKTPG----- 289
hNSUN6_5wwsA 427 -----S-----AVPLPDTDMDSLREARRDMLRLANKDSI--GEIYAKFVKC----- 466
mDNMT1_4da4A 1304 -----GQYGVQAQT-----R-RRATHLAAAP-G-EKLPPLPEPLHVFAPRACQLSVV 1347

```

**Supplementary Figure 9: Alignment of the amino acid sequences of the Rossmann-fold methyltransferases.** Human METTL-16 (hMETTL16), *C. elegans* METT10, human MePCE (hMePCE) (5), human BCDIN3D (hBCDIN3D)(6,7), human TRMT61A (hTRMT61A) (8), human NSUN6 (hNSUN6)(9) and mouse DNMT1 (mDNMT1)(10). Motifs 1, 2 and 3 are involved in the recognition of SAM.

**Supplementary Table 1: Nucleotide sequences of synthetic genes**

|                                                                                                                                                                                                                                                                                                                                                                                                                                                                                                                                                                                                                                                                                                                                                                                                                                                                                                                                                                                                                                                                                                                                                                                                                                                                                                                                                                                                                                                                                                                                                                                                                                                                                          |
|------------------------------------------------------------------------------------------------------------------------------------------------------------------------------------------------------------------------------------------------------------------------------------------------------------------------------------------------------------------------------------------------------------------------------------------------------------------------------------------------------------------------------------------------------------------------------------------------------------------------------------------------------------------------------------------------------------------------------------------------------------------------------------------------------------------------------------------------------------------------------------------------------------------------------------------------------------------------------------------------------------------------------------------------------------------------------------------------------------------------------------------------------------------------------------------------------------------------------------------------------------------------------------------------------------------------------------------------------------------------------------------------------------------------------------------------------------------------------------------------------------------------------------------------------------------------------------------------------------------------------------------------------------------------------------------|
| <p><b><i>C. elegans</i> METT-10 gene</b></p> <p>5'-<br/>ATGAGTCAGAACAACGAAATGCATCCTCGTAATCCTTACCGCAACAAACCGCCGGATTT<br/>CAAAGCGTTAGCTGTGGAATATCCGGAATTTTCGCAAATTCTGTCAGTATGTGTCTAACGG<br/>AAAAGTTACCTTCGACTTCAAAAAAGACGCCGCGGTTTCGTTGTCTAACACAAACCTTGC<br/>TGAAGAAAGATTTCAATCTGGATGTCGAGATTCCGCCTGGTCATCTGGTCCCAAGGGTTC<br/>CTCAGAAACTGAACTATTGCCTGCTGATTGATGATCTGCTGAAAGCCAACAAACTCACC<br/>AAGAATGTGATCGGCATTGATATAGGTACCGGCACTTCCTGCATTCATGCACTGATTGGG<br/>GCTCGTCAGTTCAACTGGAAGTTCATCGCTACAGATGGCGACGAAAAAGCGTGCGAG<br/>TTGCACACGAGAATGTGCTAAAAACGGCTTGTCTTCTAGCATTGCGTTGTGCACGTTA<br/>ATCCGGATGTGAAGACGGTGCTGATGGATGTGGTCAATACGATTCCAGACACTGACTATG<br/>CGTTTTGCATGTGCAATCCGCCGTTTTTTGAGAAAGGTAATGGCGATGACAAATTTTTCG<br/>AGGATATCTCAAGTTCGACAGAAACCTACAGCAACCGTGTAGCCTCCGAATTTTCGGACT<br/>GCACCGCATTCTGCGACCTTTGCGTCGAGTGGCGAACTGTTTGTGATGGTGGAGAAGT<br/>GGCGTTCGTGAACCGCATTATCGATGACTCCGTGTTGTTACGCGATCGAATTAAGATCTA<br/>CACCACGATGATTGGCCGCAAATCATCGCTCAAACCCTTGCAGAACCGCTTACAGCGCT<br/>TTGGTGATGACGTAAAAATCATGATCTCAGTCTTGAACCAAGGCAAAACGAAACGTTGG<br/>ATGCTGGCGTGGACCTTTTCCAAAAGCGTAAGTCTGACGACCATTGATCGTCCCATCTCG<br/>TTTCAGTGTCCAAAACCCGGCTTAACTCGGCTGATGCAGGAAATTAGCATCTTAAACGG<br/>ACGTCTGCGTCAGGAAGACACACTGGCCATTGTGGCGGAGTTCAAGTGTGTAACGTGG<br/>ACCAATCAACGTGCCAGAAAACGCGCAAAAGCCATTCTTAGCGAAAGCTCAATCAAAA<br/>AGGCCAAGTGGAACCTTAGCAACGTGGCATGTCAGGTTGCATTTGGTGCTGGTGTATGGG<br/>AAAGACTCCTATACCGATGCAGGGAACCTCGTTAGTTCGGAATCTATTCGACGAATAAT<br/>CTGAATGCCTGGGACAATGCGTCACAAGCGTATTTCCCGCTTCCAAATGGCGAAGTTCC<br/>GGGTCCGATCATTTCGCATCCGTATACAGGTATTTTCGGAAGATAGCTACGACAGCATCAG<br/>TTTTGAGCTTATTTCCGGCAGCAAACAACATCTCCACCAACTCGTCCAGTACCTGAAAA<br/>ACCTTATCTGCCGCTGA -3'</p> |
| <p><b>sams hp-ls gene for <i>in vitro</i> transcription</b></p> <p>5'-<br/>ATCGGAATTCTAATACGACTCACTATAGGCAACAATATGTTTCTTTACCTGTTACAACGGT<br/>TACTTTGATTACAGAAACGGTGACTAAAACGGGTATGATCATGTTGTGCCCCATACGCGT<br/>CATCCAAGCTTATCG -3'</p>                                                                                                                                                                                                                                                                                                                                                                                                                                                                                                                                                                                                                                                                                                                                                                                                                                                                                                                                                                                                                                                                                                                                                                                                                                                                                                                                                                                                                                                    |
| <p><b><i>C. elegans</i> U6 snRNA gene for <i>in vitro</i> transcription</b></p> <p>5'-<br/>ATCGGAATTCTAATACGACTCACTATAGTTCTTCCGAGAACATATACTAAAATTGGAACAA<br/>TACAGAGAAGATTAGCATGGCCCCTGCGCAAGGATGACACGCAAATTCGTGAAGCGTTC<br/>CAAATTTTTTCATACGCGTCATCCAAGCTTATCG -3'</p>                                                                                                                                                                                                                                                                                                                                                                                                                                                                                                                                                                                                                                                                                                                                                                                                                                                                                                                                                                                                                                                                                                                                                                                                                                                                                                                                                                                                                  |

**Supplementary Table 2: Oligo-nucleotide sequences**

| <b>Primer name</b>               | <b>Sequence</b>                                      |
|----------------------------------|------------------------------------------------------|
| METT10_Forward                   | 5'-<br>CTGCAGCATATGAGTCAGAACAACGAAATGCATCCTC -<br>3' |
| METT10-FL_Reverse                | 5'- GACCTCGAGGCGGCAGATAAGGTTTTTCAGG- 3'              |
| METT10-FL-ΔL_For                 | 5'- GGCGAAGTTCCGGGTCCGATCATTG -3'                    |
| METT10-FL-ΔL_Rev                 | 5'- TGCCACGTTGCTAAAGTTCCACTTG -3'                    |
| METT10-FLΔL-<br>RRR/7E Forward   | 5'- GAAGAAGAAGAAGCCATTCTTAGCGAAAGCTC -3'             |
| METT10-FLΔL-<br>RRR/7E Reverse   | 5'- TTCTTCTTCTTGATTGGTCCACGTTACACAC -3'              |
| METT10-MTD_1-314_Rev             | 5'- TATCTCGAGACGATCAATGGTCGTCGACTTACG -3'            |
| METT10-MTD_ΔN-40-<br>314 Forward | 5'- GGAAAAGTTACCTTCGACTTC -3'                        |
| METT10-MTD_ΔN-40-<br>314 Reverse | 5'- CATATGTATATCTCCTTCTTAAAGT -3'                    |
| METT10-MTD_G108C_For             | 5'- TGCACCGGCACTTCCTGCATTCATG -3'                    |
| METT10-MTD_G108C_Rev             | 5'- TATATCAATGCCGATCACATTCTTGG -3'                   |
| METT10-MTD_D131A_For             | 5'- GCGGGCGACGAAAAAAGCGTGCGAG -3'                    |
| METT10-MTD_D131A_Rev             | 5'- TGTAGCGATGAACTTCCAGTTGAAC -3'                    |
| METT10-MTD_K163A_For             | 5'- GCGACGGTGCTGATGGATGTG -3'                        |
| METT10-MTD_K163A_Rev             | 5'- CACATCCGGATTAACGTGCACAAC -3'                     |
| METT10-MTD_M167A_For             | 5'- GCGGATGTGGTCAATACGATTC -3'                       |
| METT10-MTD_M167A_Rev             | 5'- CAGCACCGTCTTCACATCCG -3'                         |
| METT10-MTD_N184A_For             | 5'- GCGCCGCCGTTTTTTGAGAAAGGTAATG -3'                 |
| METT10-MTD_N184A_Rev             | 5'- GCACATGCAAAACGCATAGTCAGTGTCTG -3'                |
| METT10-MTD_F187A_For             | 5'- GCGTTTGAGAAAGGTAATGGCGATGAC -3'                  |
| METT10-MTD_F187A_Rev             | 5'- CGGCGGATTGCACATGCAAAACGCATAG -3'                 |
| METT10-<br>MTD_KF196/197AA_For   | 5'- GCGGCGTGCGAGGATATCTCAAGTTC -3'                   |
| METT10-<br>MTD_KF196/197AA_Rev   | 5'- GTCATCGCCATTACCTTTCTCAAAAACGG -3'                |
| METT10-MTD_R217A_For             | 5'- GCGACTGCACCGCATTCTGCGACCT -3'                    |
| METT10-MTD_R217A_Rev             | 5'- AAATTCGGAGGCTACACGGTTGCTGTAG -3'                 |

**Supplementary Table 3: Nucleotide sequences of RNA substrates.**

| RNA           | Sequence                                                                                                                |
|---------------|-------------------------------------------------------------------------------------------------------------------------|
| sams-hp       | 5'- GGGUUACUUUGAUUACAGAAACGGUGACCC -3'                                                                                  |
| $\Delta$ stem | 5'- GGGUCUUUGAUUACAGAAACGGUGACCC -3'                                                                                    |
| R1            | 5'- GGGUUACUUUGAUCACAGAAACGGUGACCC -3'                                                                                  |
| R2            | 5'- GGGUUACUUUGAUUAUAGAAACGGUGACCC -3'                                                                                  |
| L1            | 5'- GGGUUACUUUCAUACAGAAACGGUGACCC -3'                                                                                   |
| L2            | 5'- GGGUUACUUUGUUUACAGAAACGGUGACCC -3'                                                                                  |
| T1            | 5'- GGGUUACUUAGAUUACAGAAACGGUGACCC -3'                                                                                  |
| T2            | 5'- GGGUUACUGUGAUUACAGAAACGGUGACCC -3'                                                                                  |
| T3            | 5'- GGGUUACUUUGAUUACAGAUUCGGUGACCC -3'                                                                                  |
| T4            | 5'- GGGUUACUUUGAUUACAGAUUGGGUGACCC -3'                                                                                  |
| sams hp-ls    | 5'-<br>GGCAACAAUAUGUUUCUUUACCUGUUACAACGGUUACUUUGA<br>UUACAGAAACGGUGACUAAAACGGGUAUGAUCAUGUUGUGCC<br>C -3'                |
| U6 snRNA      | 5'-<br>GUUCUCCGAGAACAUAUACUAAAAUUGGAACAAUACAGAGA<br>AGAUUAGCAUGGCCCCUGCGCAAGGAUGACACGCAAUUCGU<br>GAAGCGUUCCAAUUUUUU -3' |



## References

1. Doxtader, K.A., Wang, P., Scarborough, A.M., Seo, D., Conrad, N.K. and Nam, Y. (2018) Structural Basis for Regulation of METTL16, an S-Adenosylmethionine Homeostasis Factor. *Mol Cell*, **71**, 1001-1011 e1004.
2. Jumper, J., Evans, R., Pritzel, A., Green, T., Figurnov, M., Ronneberger, O., Tunyasuvunakool, K., Bates, R., Žídek, A., Potapenko, A. *et al.* (2021) Highly accurate protein structure prediction with AlphaFold. *Nature*, **596**, 583-589.
3. Varadi, M., Anyango, S., Deshpande, M., Nair, S., Natassia, C., Yordanova, G., Yuan, D., Stroe, O., Wood, G., Laydon, A. *et al.* (2021) AlphaFold Protein Structure Database: massively expanding the structural coverage of protein-sequence space with high-accuracy models. *Nucleic Acids Res.*, **50**, D439-D444.
4. Aoyama, T., Yamashita, S. and Tomita, K. (2020) Mechanistic insights into m6A modification of U6 snRNA by human METTL16. *Nucleic Acids Res*, **48**, 5157-5168.
5. Yang, Y., Eichhorn, C.D., Wang, Y., Cascio, D. and Feigon, J. (2019) Structural basis of 7SK RNA 5'- $\gamma$ -phosphate methylation and retention by MePCE. *Nat Chem Biol*, **15**, 132-140.
6. Martinez, A., Yamashita, S., Nagaïke, T., Sakaguchi, Y., Suzuki, T. and Tomita, K. (2017) Human BCDIN3D monomethylates cytoplasmic histidine transfer RNA. *Nucleic Acids Res.*, **45**, 5423-5436.
7. Liu, Y., Martinez, A., Yamashita, S. and Tomita, K. (2020) Crystal structure of human cytoplasmic tRNA<sup>His</sup>-specific 5'-monomethylphosphate capping enzyme. *Nucleic Acids Res.*, **48**, 1572-1582.
8. Finer-Moore, J., Czudnochowski, N., O'Connell, J.D., 3rd, Wang, A.L. and Stroud, R.M. (2015) Crystal Structure of the Human tRNA m(1)A58 Methyltransferase-tRNA(3)(Lys) Complex: Refolding of Substrate tRNA Allows Access to the Methylation Target. *J Mol Biol*, **427**, 3862-3876.
9. Liu, R.J., Long, T., Li, J., Li, H. and Wang, E.D. (2017) Structural basis for substrate binding and catalytic mechanism of a human RNA:m5C methyltransferase NSun6. *Nucleic Acids Res*, **45**, 6684-6697.
10. Song, J., Teplova, M., Ishibe-Murakami, S. and Patel, D.J. (2012) Structure-based mechanistic insights into DNMT1-mediated maintenance DNA methylation. *Science*, **335**, 709-712.
